# Supplementary material for: Substrate Specificity and Biochemical Characteristics of an Engineered Mammalian Chondroitinase ABC
Source: PubMed Central journal article supplement (PMC8153898; doi:10.1021/acsomega.0c06262), 2021-04-19
Supplement: ao0c06262_si_001.pdf [file ao0c06262_si_001.pdf]

# Substrate specificity and biochemical characteristics of an engineered mammalian chondroitinase ABC

*AUTHOR NAMES: Philippa M. Warren<sup>a,b,c\*</sup>, James W. Fawcett<sup>a,d#</sup>, Jessica C. F. Kwok<sup>a,d,e#</sup>*

*\* denotes corresponding author; # co-senior author*

*AUTHOR AFFILIATION:*

*<sup>a</sup> Department of Clinical Neurosciences, John van Geest Centre for Brain Repair,*

*University of Cambridge, Cambridge CB2 0PY, United Kingdom*

*<sup>b</sup> Wolfson Centre for Age Related Diseases, Institute of Psychiatry, Psychology and*

*Neuroscience, King's College London, Guy's Campus, London Bridge, London, United*

*Kingdom*

*<sup>c</sup> Department of Physiology, Development and Neuroscience, University of Cambridge,*

*Cambridge CB2 0PY, United Kingdom*

<sup>d</sup> *Centre for Reconstructive Neuroscience, Institute of Experimental Medicine, Czech*

*Academy of Sciences, Videnska 1083, 14220 Prague 4, Czech Republic*

<sup>e</sup> *School of Biomedical Sciences, Faculty of Biological Sciences, University of Leeds,*

*Leeds LS2 9JT, United Kingdom*

SUPPORTING INFORMATION:

Supplementary Figures: 2

SUPPORTING INFORMATION:

**mChABC-mCherry transfection of HEK293 cells**

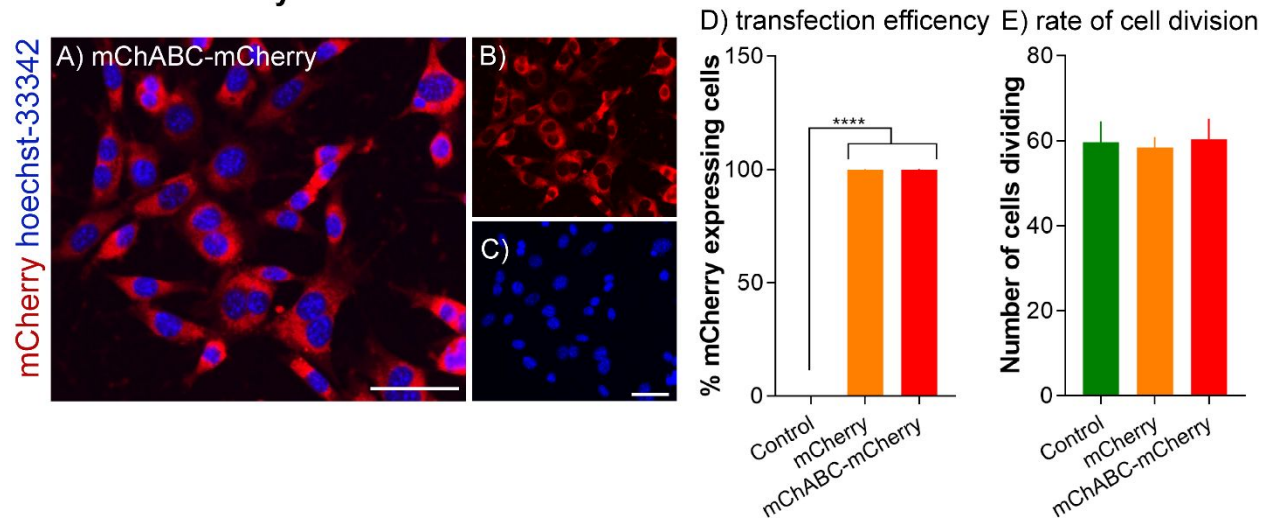

**Figure S1:** Expression and secretion of active mChABC-mCherry from HEK293 cells. A- C) mChABC-mCherry is readily transfected into HEK293 cells. A) HEK293 cells were either naïve (control), or transfected with mCherry or mChABC-mCherry. Image shows individual channels and a merge. Scale bar = 40  $\mu$ m. D) Transfection efficiency for mCherry and mChABC-mCherry are ~100% (N=6 independent cell batches assessed per group) and not divergent from each other (P=0.825) although both are divergent from control (F(2,15)=0.618, P<0.0001; ANOVA with post-hoc Turkey). E) Using anti-Ki67

staining, percentages of HEK cell division was not altered by transfection (N=8 independent cell batches assessed per group;  $F(2,21)=0.434$ ,  $P=0.654$ ; ANOVA with post hoc Turkey). For panels D and E, data shows means  $\pm$  SD.

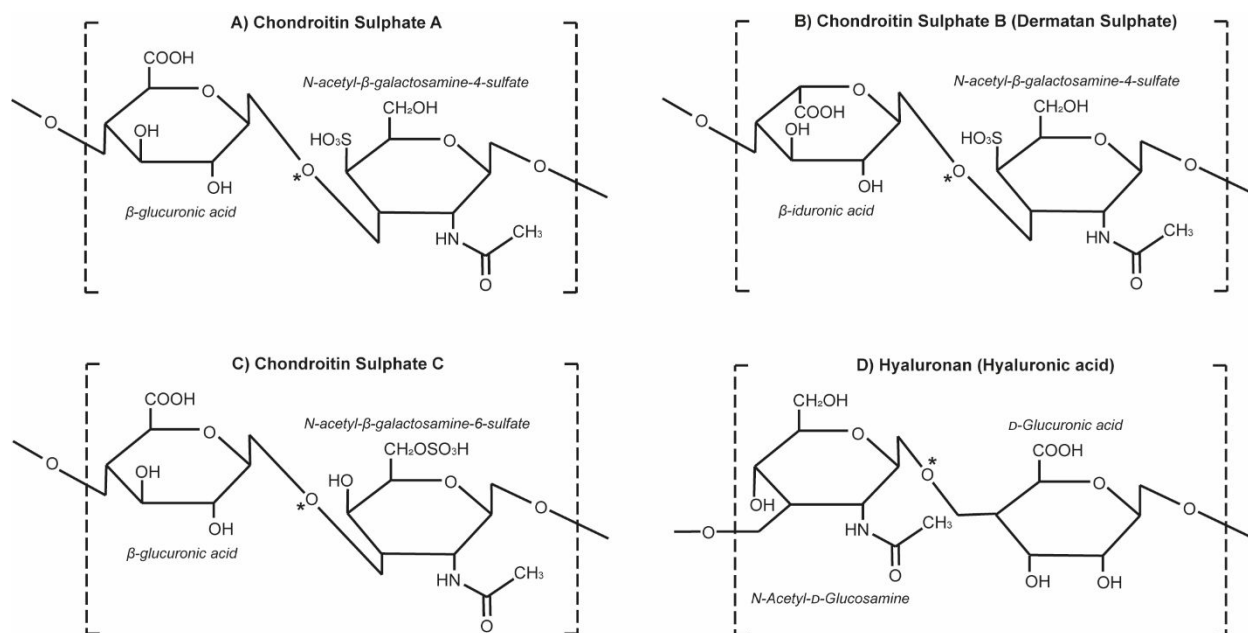

**Figure S2:** Chemical structure of chondroitin sulphate A (CS-A), chondroitin sulphate B (dermantan sulphate, DS), chondroitin sulphate C (CS-C), and hyaluronan (hyaluronic acid, HA). A-C) Chondroitin sulphate and dermantan sulfate are composed of disaccharides of N-acetylgalactosamine and an uronic acid joined by  $\beta(1\rightarrow4)$  or  $\beta(1\rightarrow3)$  linkages, respectively. A) CS-A contains glucuronic acid and is 4 O-sulfated (the

alternating co-polymer  $\beta$ -glucuronic acid-(1-3)-N-acetyl- $\beta$ -galactosamine-4-sulfate). B) DS contains N-acetylgalactosamine, but the uronic acid present is L-iduronic acid (the alternating co-polymer  $\beta$ -iduronic acid-(1-3)-N-acetyl- $\beta$ -galactosamine-4-sulfate). C) CS-A contains glucuronic acid and is 6 O-sulfated (the alternating co-polymer  $\beta$ -glucuronic acid-(1-3)-N-acetyl- $\beta$ -galactosamine-6-sulfate). D) HA is comprised of alternating  $\beta$ -D-(1 $\rightarrow$ 3) glucuronic acid and  $\beta$ -D-(1 $\rightarrow$ 4)-N-acetylglucosamine residues. For all panels: \* represents the point at which chondroitinase ABC would cut break the disaccharides/residuals apart.
